# Supplementary material for: Glucose Metabolism as a Potential Therapeutic Target in Cytarabine-Resistant Acute Myeloid Leukemia
Source: MDPI journal article supplement (doi:10.3390/pharmaceutics16040442), 2024-03-22
Supplement: s1 [file s1]

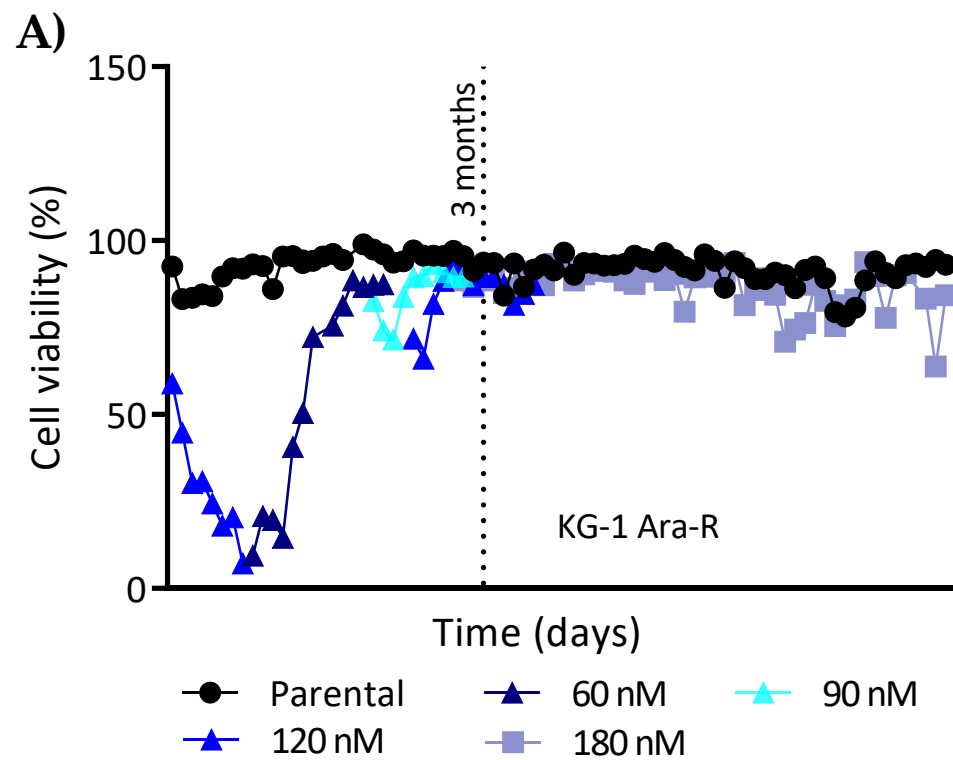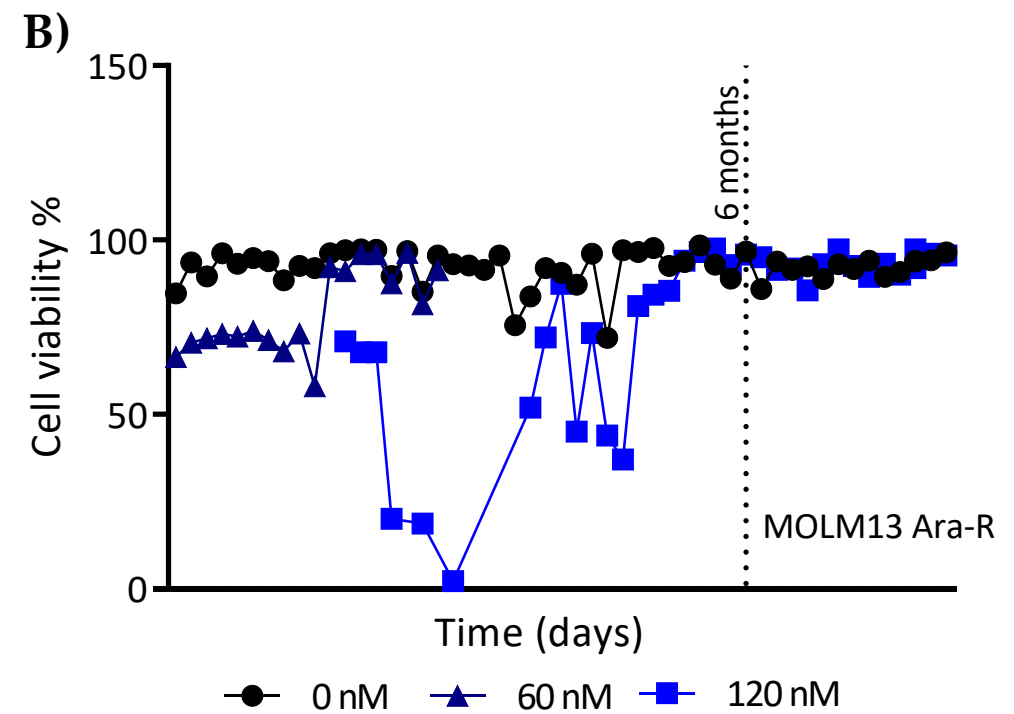

**Figure S1. Induction of Ara-C resistance in AML cell lines.** (A) KG-1 and (B) MOLM13 cells were exposed to increasing concentrations of cytarabine (Ara-C). Resistance to Ara-C was induced in KG-1 and MOLM13 cells for 3 and 6 months, respectively.

A)

| Number of cells<br>(mean of four independent experiments) |        |       |            |        |
|-----------------------------------------------------------|--------|-------|------------|--------|
| Cell line                                                 | KG-1   |       | KG-1 Ara-R |        |
| Time (h)                                                  | MEAN   | SD ±  | MEAN       | SD ±   |
| 24                                                        | 36979  | 10225 | 42813      | 19153  |
| 48                                                        | 74583  | 18887 | 78958      | 35929  |
| 72                                                        | 133125 | 18576 | 126979     | 56648  |
| 96                                                        | 256979 | 47888 | 258021     | 111830 |
| Td = ln(2)/B<br>(h)                                       | 26.058 |       | 28.408     |        |
| μ =<br>[ln(N(96)/N(24))]/t(72)<br>(h <sup>-1</sup> )      | 0.027  |       | 0.025      |        |

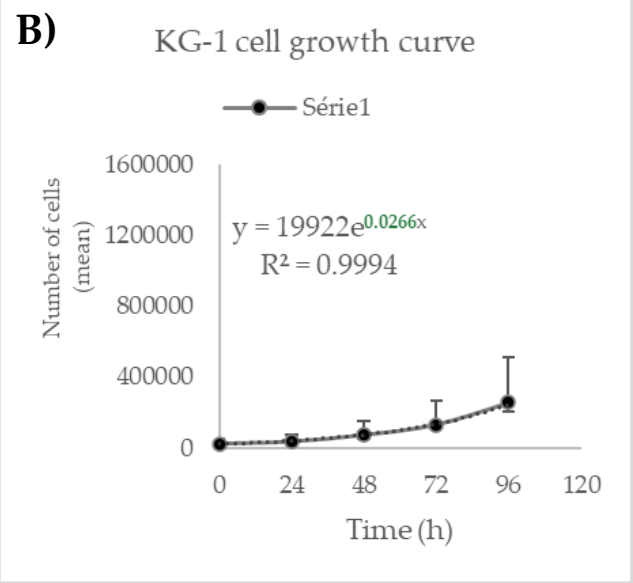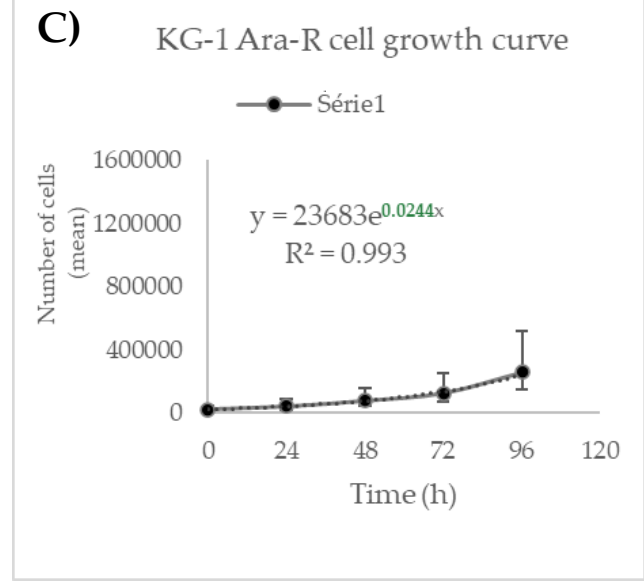

D)

| Number of cells<br>(mean of four independent experiments) |        |        |              |        |
|-----------------------------------------------------------|--------|--------|--------------|--------|
| Cell line                                                 | MOLM13 |        | MOLM13 Ara-R |        |
| Time (h)                                                  | MEAN   | SD ±   | MEAN         | SD ±   |
| 24                                                        | 43125  | 8344   | 34444        | 14181  |
| 48                                                        | 117813 | 12348  | 74861        | 35607  |
| 72                                                        | 298229 | 32103  | 159167       | 123627 |
| 96                                                        | 668750 | 100606 | 326389       | 248965 |
| Td = ln(2)/B<br>(h)                                       | 18.193 |        | 22.145       |        |
| μ =<br>[ln(N(96)/N(24))]/t(72)<br>(h <sup>-1</sup> )      | 0.038  |        | 0.031        |        |

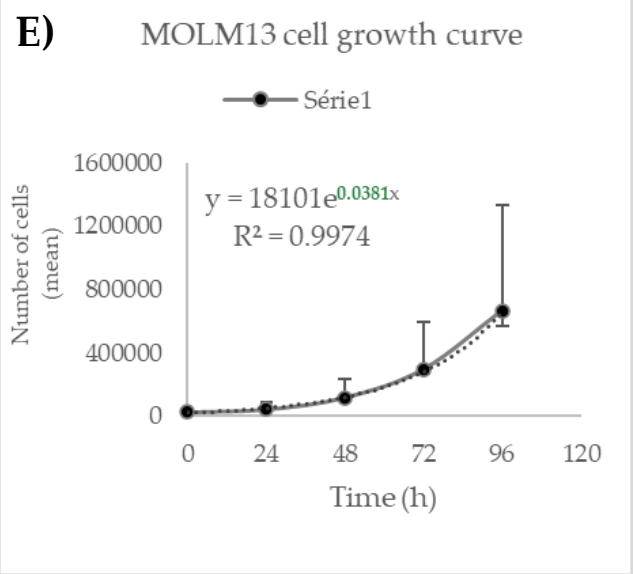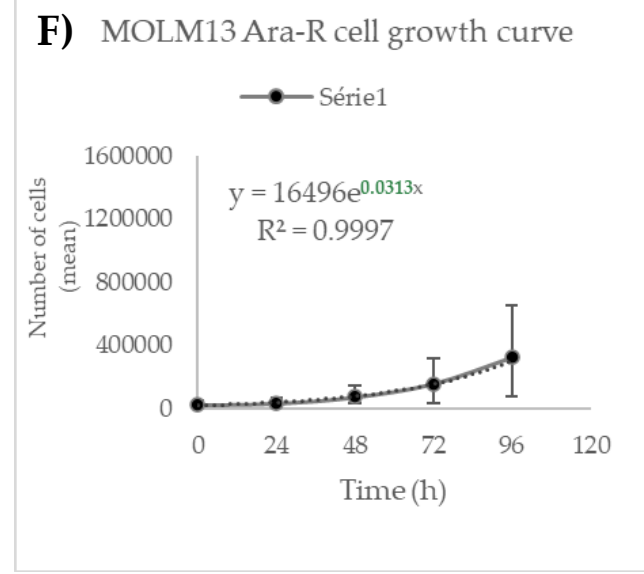

**Figure S2. Calculation of doubling time (Td) and growth rates (μ) in cytarabine (Ara-C)-resistant cell lines.** A-C) KG-1, KG-1 Ara-R and D-F) MOLM13, MOLM13 Ara-R cell lines were seeded into 24-well plates in complete RPMI medium. B-C, E-F) Growth curves were generated from mean of cell numbers of four independent experiments shown in A-C) for KG-1 and KG-1 Ara-R cells, and in D-E) for MOLM13 and MOLM13 Ara-R cells, using manual cell counting in the Neubauer chamber every 24h for 4 days. Td was calculated from line equation were the green values corresponded to the B value.

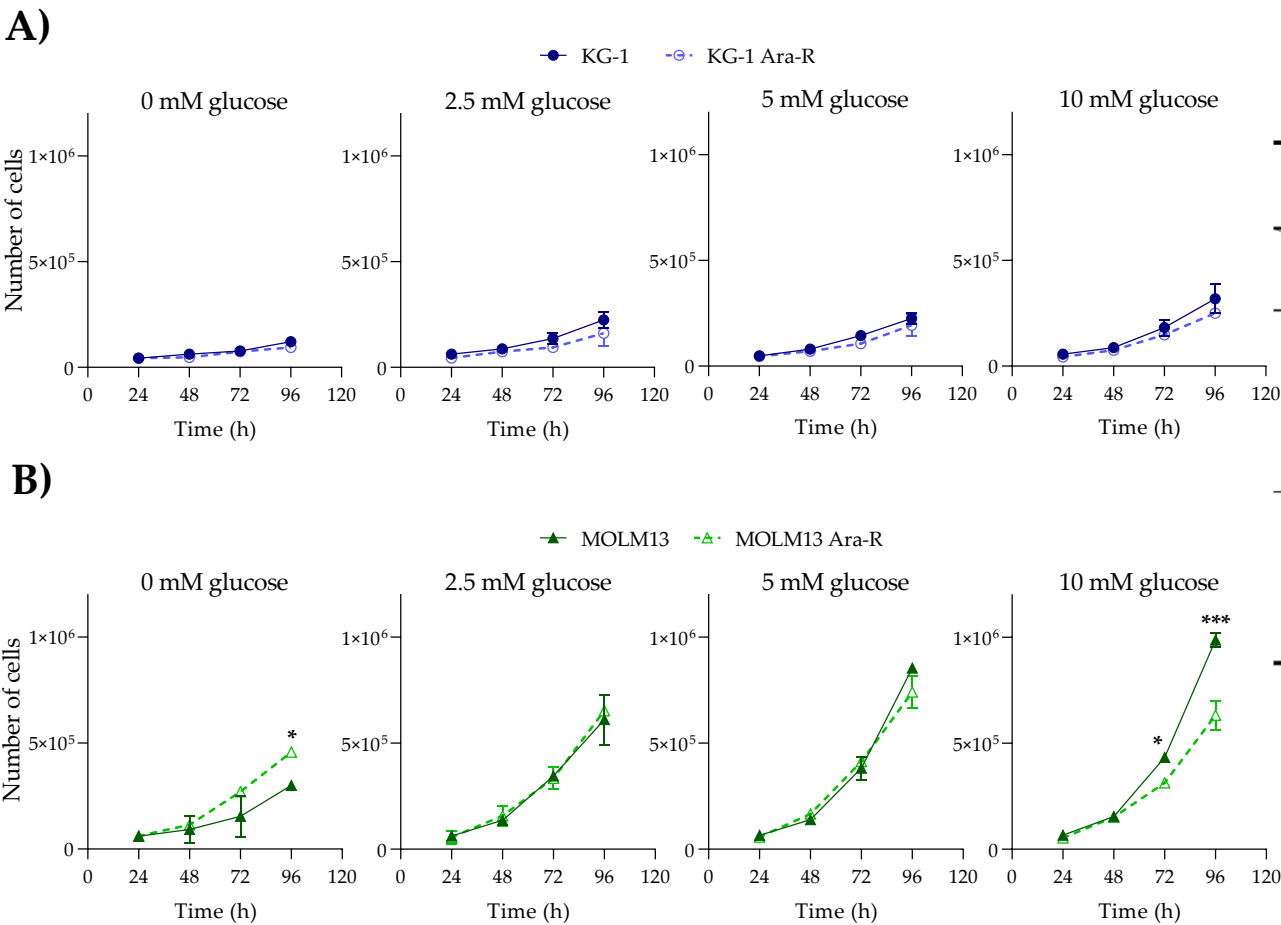

**C)**

| DOUBLING TIME (Td) ± SD<br>(h) |              |               |               |               | GROWTH RATE (μ) ± SD<br>(h <sup>-1</sup> ) |               |               |                |
|--------------------------------|--------------|---------------|---------------|---------------|--------------------------------------------|---------------|---------------|----------------|
| Glucose<br>(mM)                | 0            | 2.5           | 5             | 10            | 0                                          | 2.5           | 5             | 10             |
| Cell line                      |              |               |               |               |                                            |               |               |                |
| KG-1                           | 44.68 ± 3.05 | 32.61 ± 4.93* | 30.44 ± 1.51* | 26.67 ± 0.58* | 0.014 ± 0.001                              | 0.018 ± 0.006 | 0.021 ± 0.004 | 0.024 ± 0.002  |
| KG-1 Ara-R                     | 52.41 ± 5.57 | 38.40 ± 6.96  | 34.26 ± 1.51  | 28.40 ± 2.46* | 0.011 ± 0.001                              | 0.018 ± 0.002 | 0.020 ± 0.004 | 0.025 ± 0.007  |
| MOLM13                         | 25.15 ± 3.33 | 20.30 ± 1.63  | 18.54 ± 0.56  | 17.96 ± 0.53* | 0.023 ± 0.005                              | 0.032 ± 0.004 | 0.036 ± 0.003 | 0.038 ± 0.004* |
| MOLM13 Ara-R                   | 26.34 ± 5.00 | 20.16 ± 0.58  | 19.33 ± 0.84  | 20.21 ± 0.42  | 0.028 ± 0.001                              | 0.035 ± 0.008 | 0.036 ± 0.006 | 0.034 ± 0.001  |

\* Significantly different comparing the different glucose concentrations with absence of glucose (p ≤ 0.05).

**Figure S3. Effect of different glucose concentrations on cell growth rates and doubling times of AML Ara-C resistant and parental cell lines.** Cell growth curves of A) KG-1 and KG-1 Ara-R, and B) MOLM13 and MOLM13 Ara-R were analyzed over multiple population doublings.  $2.5 \times 10^4$  cells were plated with 0, 2.5, 5 and 10mM glucose. Cells were counted every 24h using Trypan blue dye. C) Values of growth rates ( $\mu$ ) and doubling times (Td) were calculated from the respective line equations. Statistical significance was determined by two-way ANOVA followed by Sidak's Multiple Comparison Test. \*  $p \leq 0.05$ ; \*\*\*  $p \leq 0.001$ . At least three independent experiments with three replicates were performed.

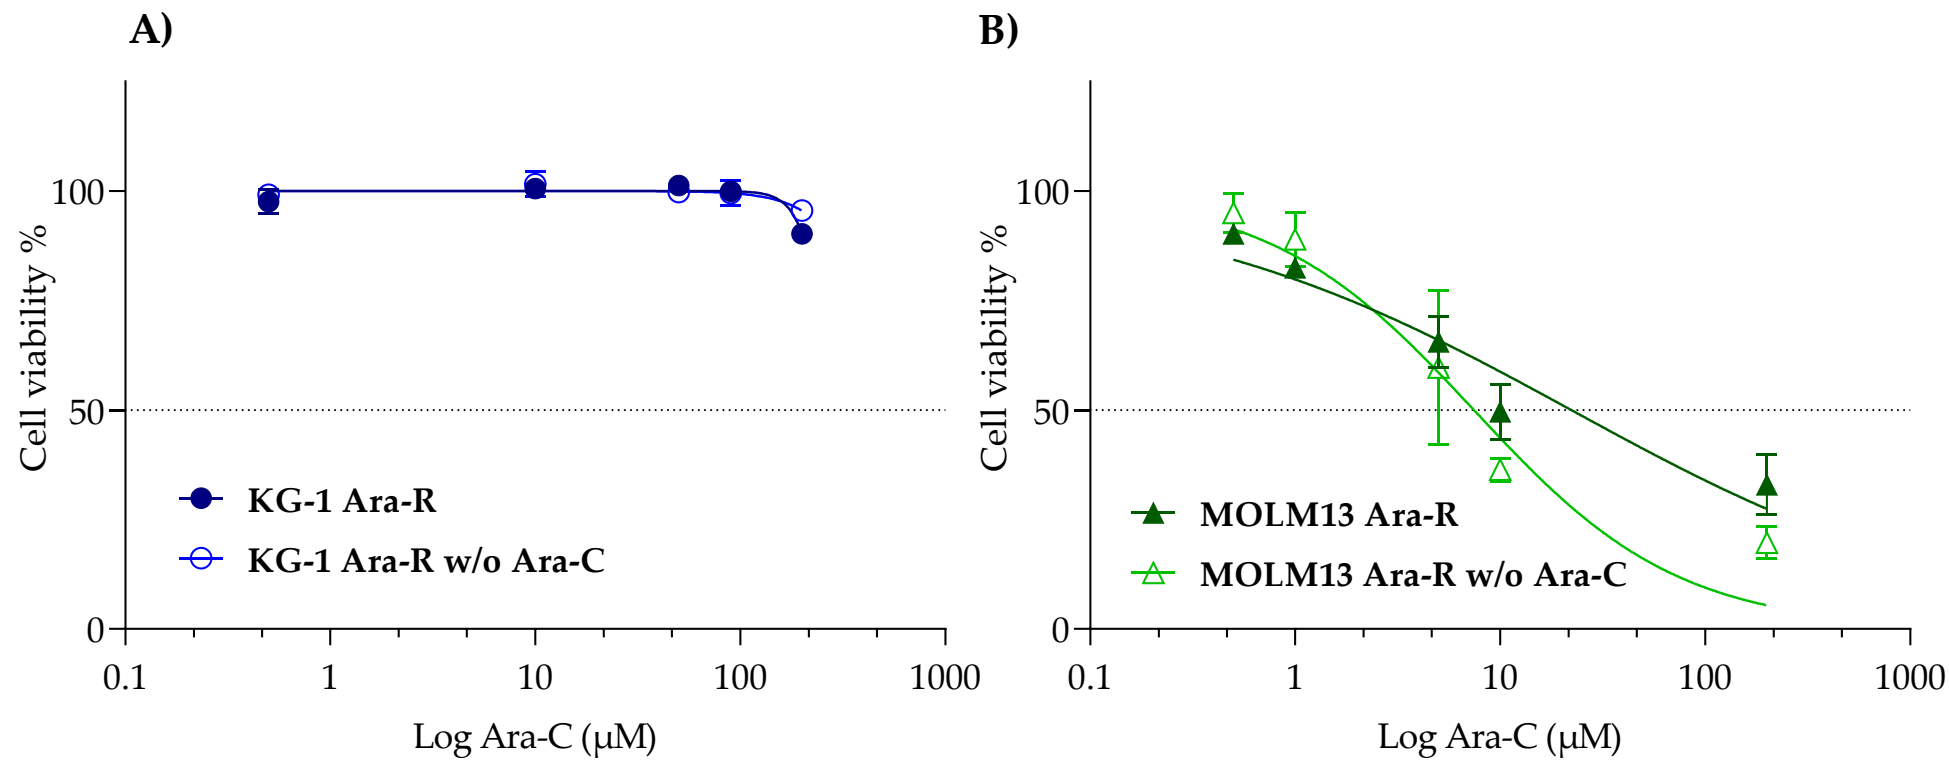

**Figure S4. Sensitivity of cytarabine (Ara-C)-resistant cells in absence of Ara-C.** Ara-C-resistant (A) KG-1 and (B) MOLM13 cells were cultured for three weeks with and without Ara-C. Cells were plated and tested with a range of Ara-C concentrations for 48h. Values are expressed as percentage of cell viability relative to vehicle-treated cells normalized to 100%. Values are given as mean  $\pm$  SD. Two-way ANOVA followed by Sidak's Multiple Comparison Test. At least three independent experiments with two replicates were performed.

A)

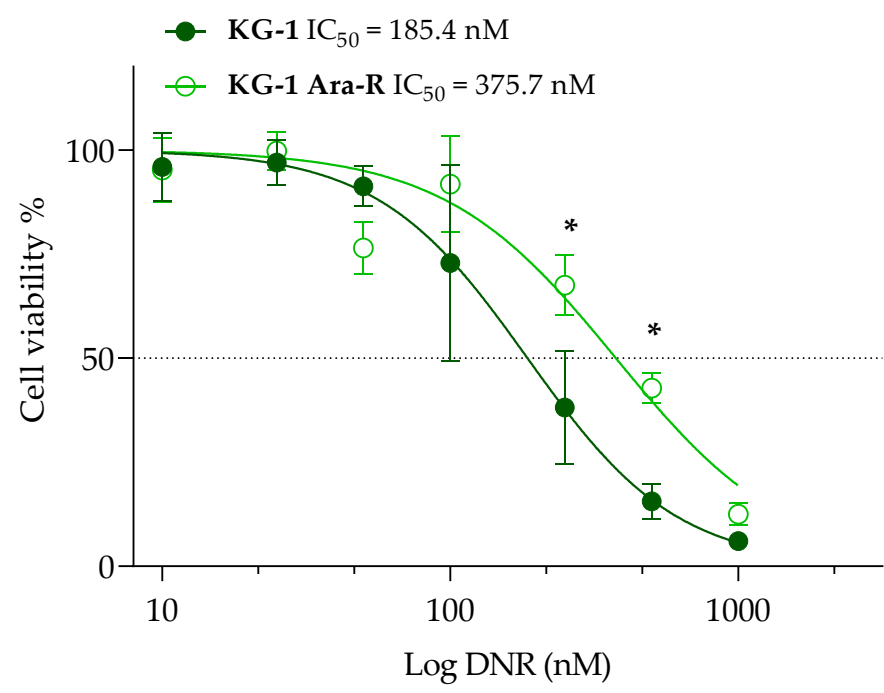

B)

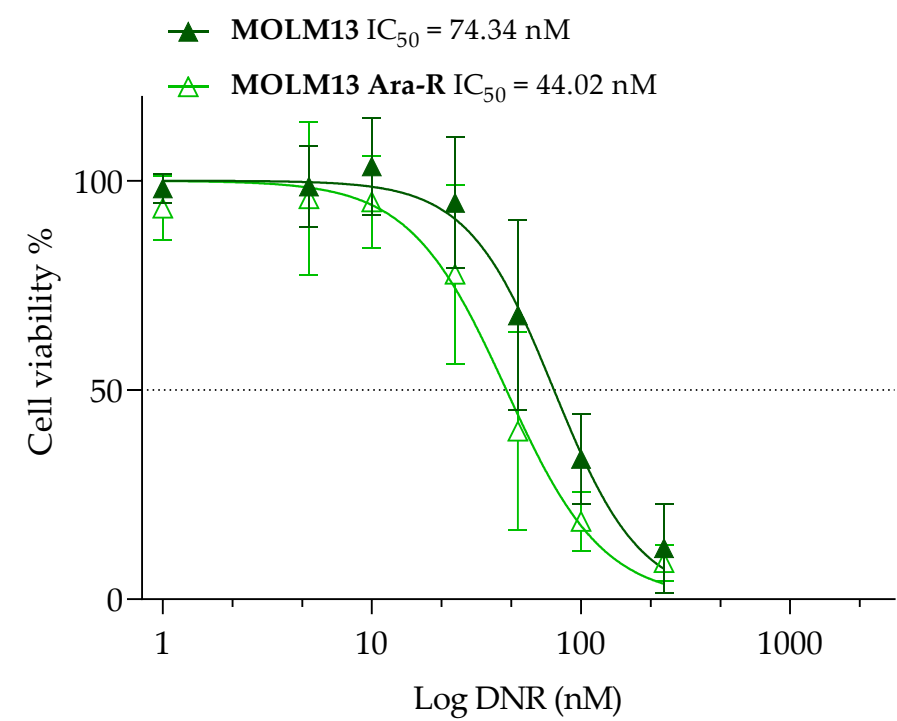

**Figure S5. Sensitivity of cytarabine (Ara-C)-resistant cells to daunorubicin (DNR).** Ara-C-resistant (A) KG-1 and (B) MOLM13 cells were plated and tested with a range of DNR concentrations. Values are expressed as percentage of cell viability relative to vehicle-treated cells normalized to 100%. Values are given as mean  $\pm$  SD. Two-way ANOVA followed by Sidak's Multiple Comparison Test. At least three independent experiments with two replicates were performed. \*  $p \leq 0.05$ .

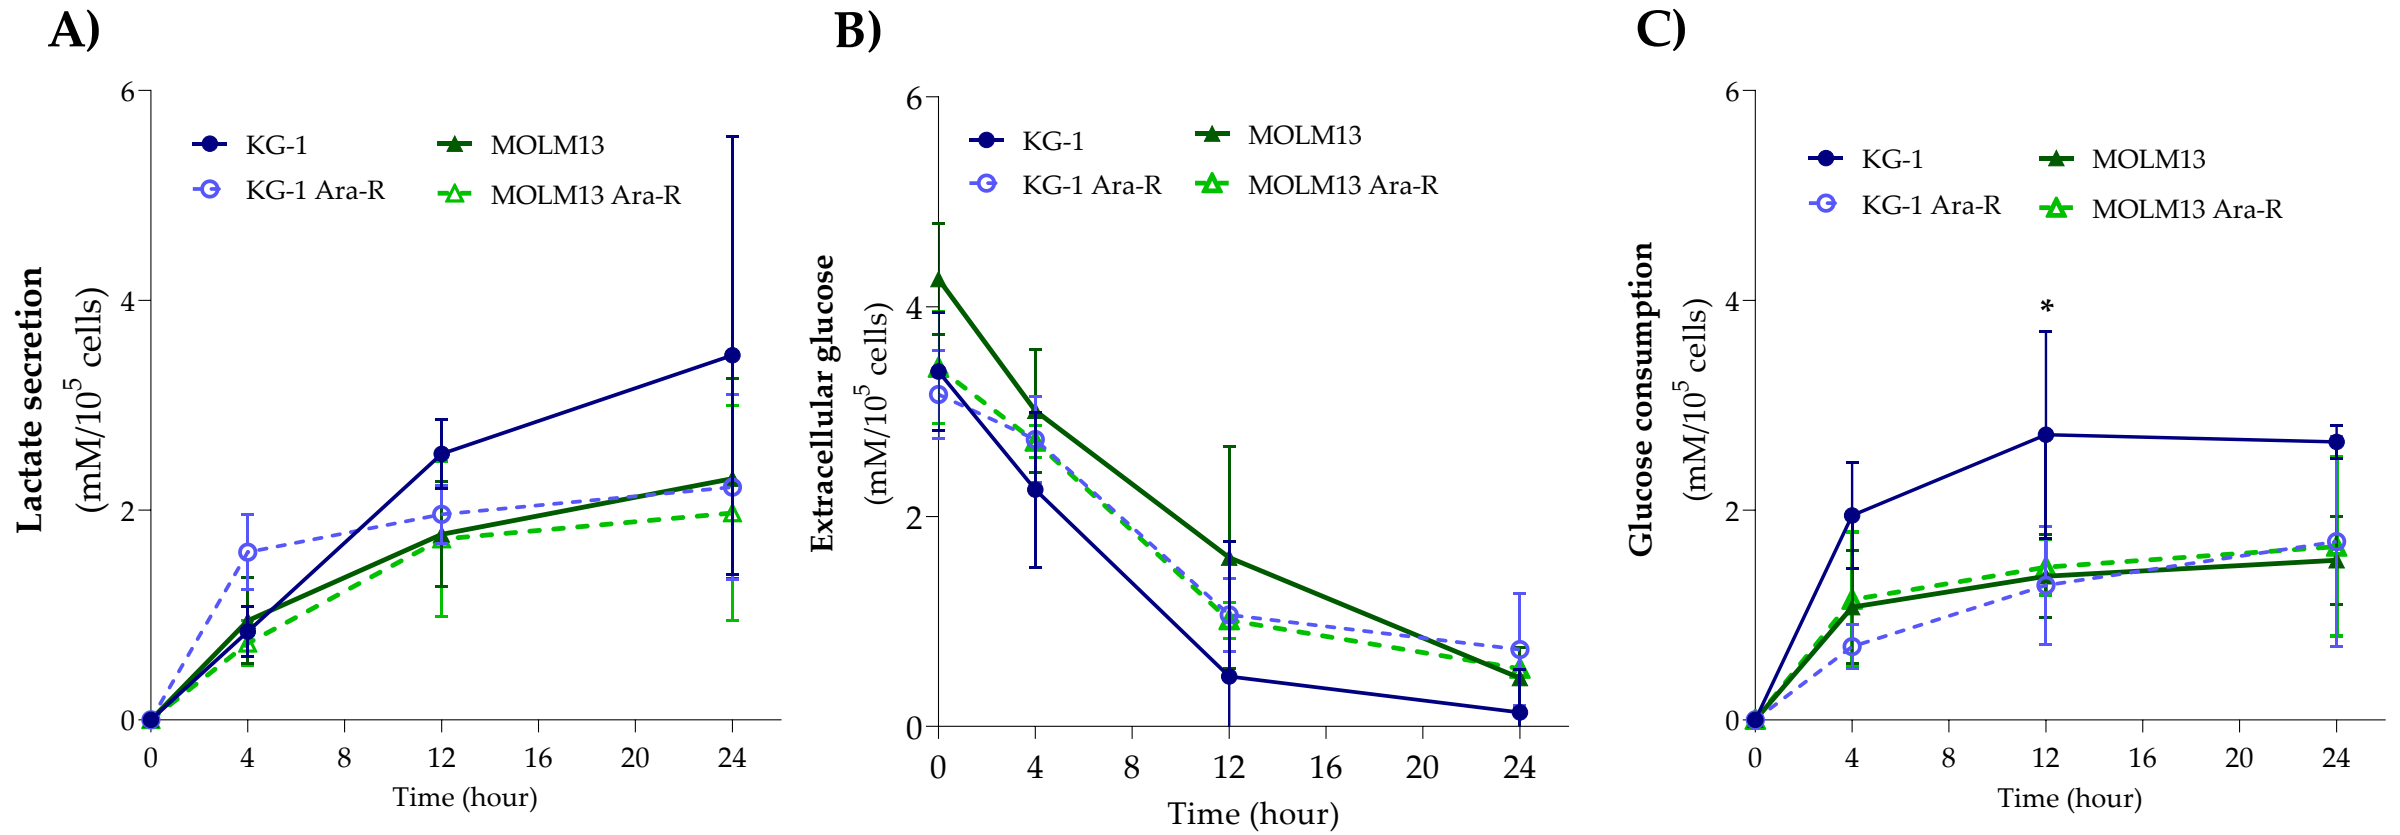

**Figure S6. Extracellular lactate and glucose, glucose consumption in parental and Ara-C resistant cell lines.** (A) Extracellular lactate levels and (B) extracellular glucose levels and (C) glucose consumption were evaluated at 0, 4, 12, and 24h for KG-1 and KG-1 Ara-R, and MOLM13, and MOLM Ara-R cells. Glucose consumption corresponds to the difference between 0 and 4, 12 or 24h of extracellular glucose levels. Results are presented as mean  $\pm$  SD from three independent experiments. Statistical significance estimated by two-way ANOVA followed by Sidak's Multiple Comparison Test: \* $p < 0.05$  (C).

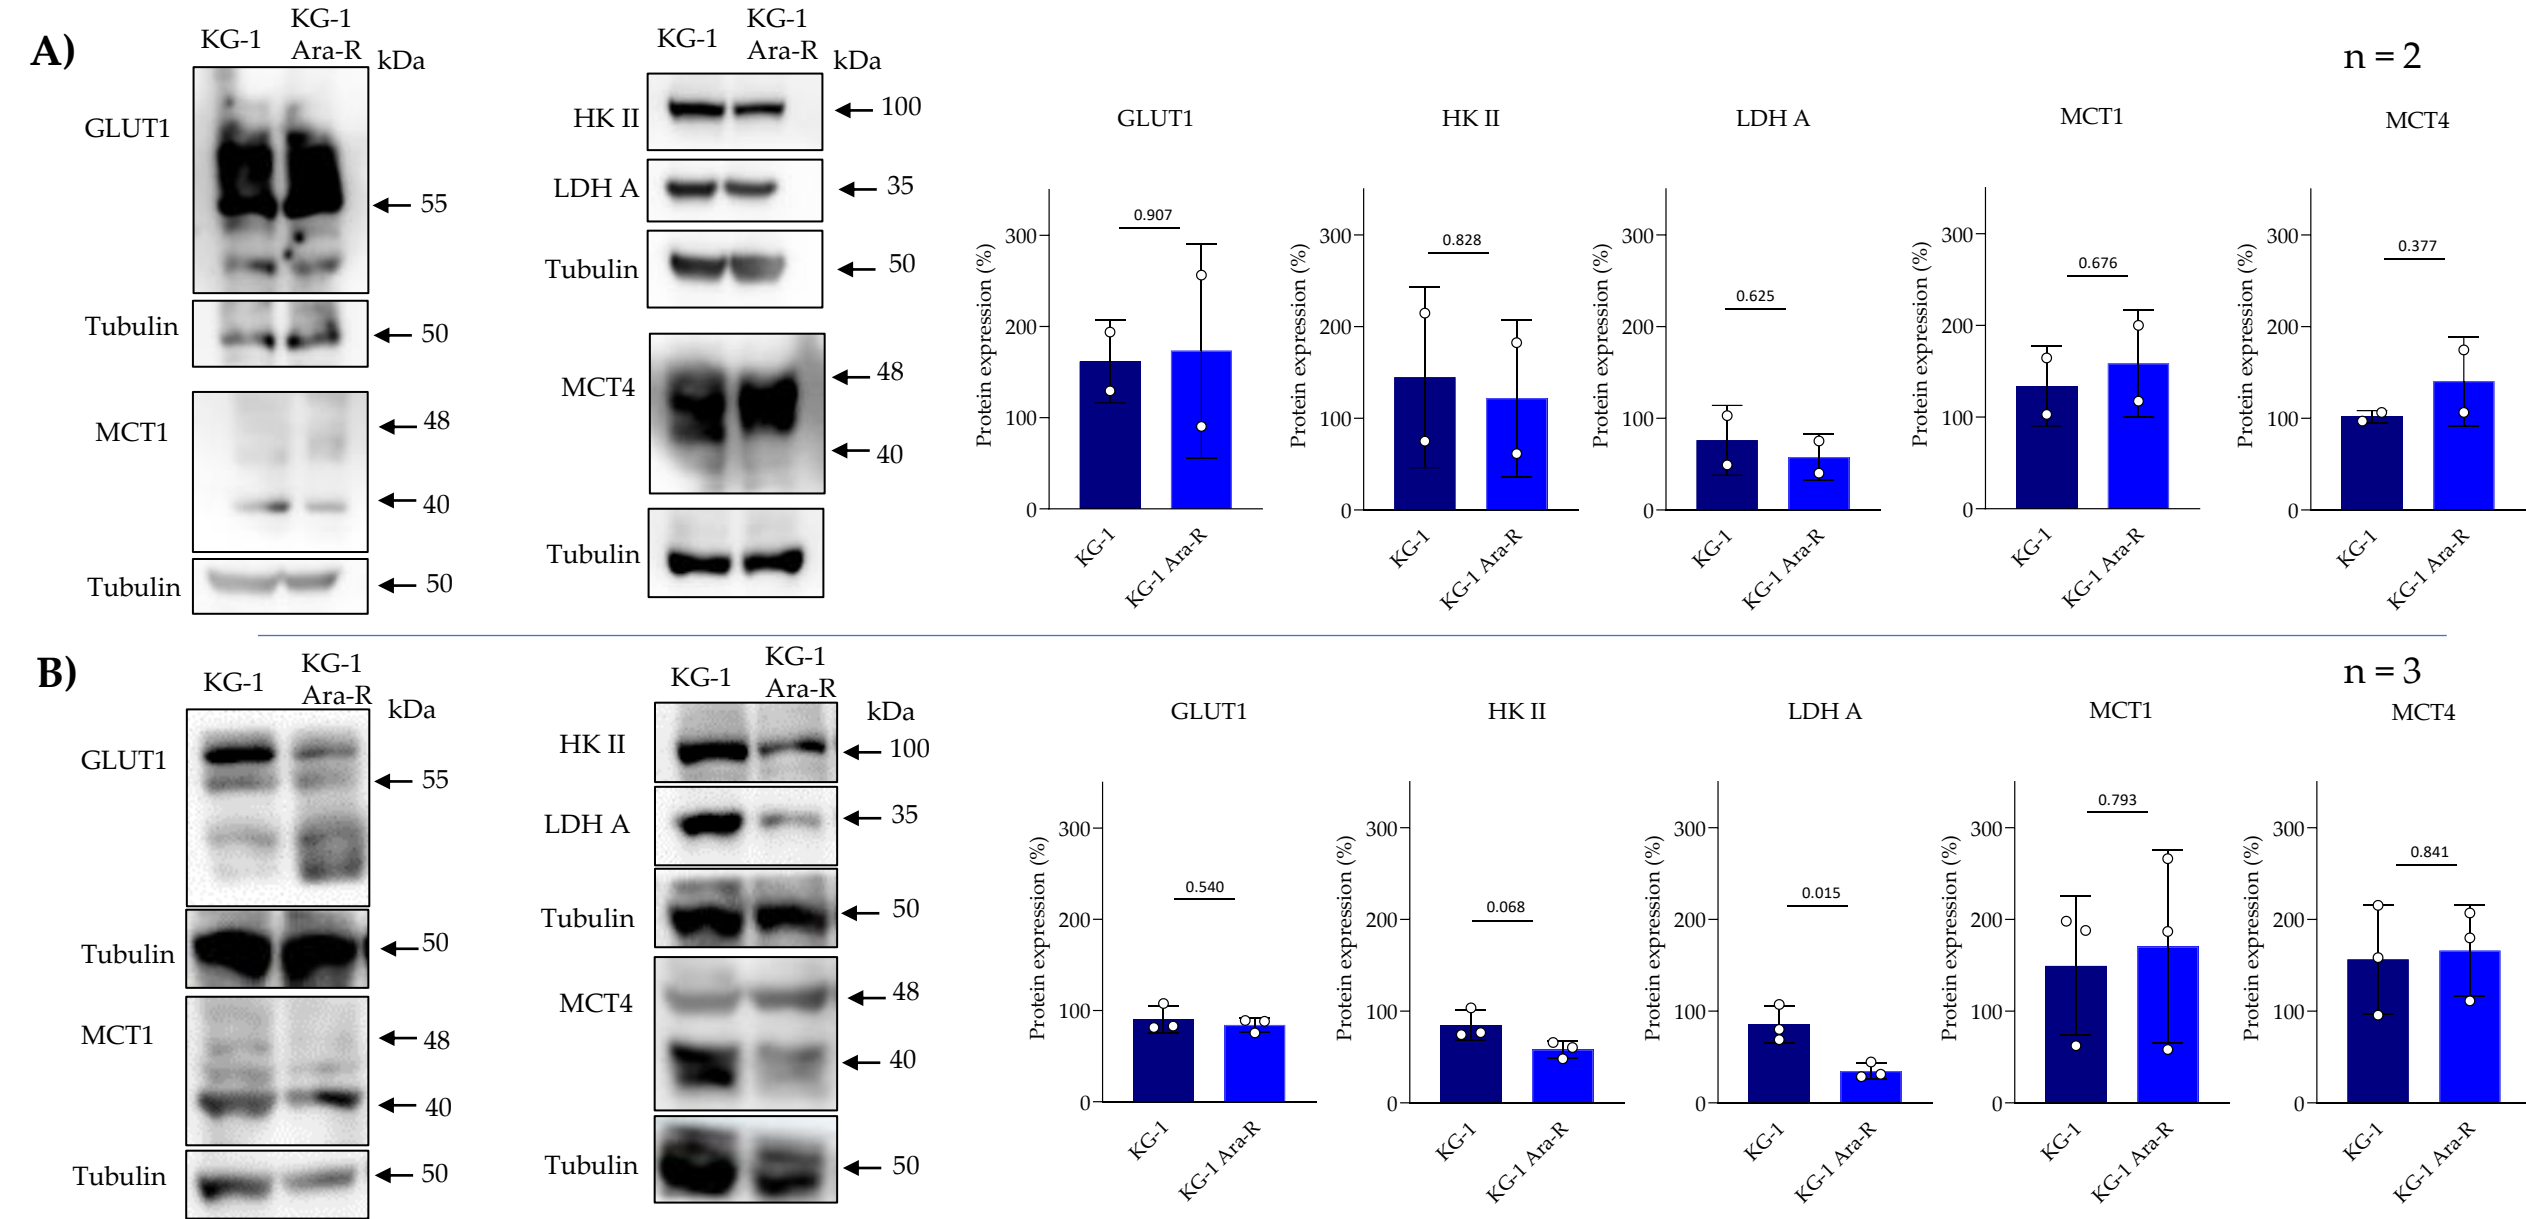

**Figure S7. Characterization of glycolytic phenotype-associated protein expression in cytarabine (Ara-C)-resistant cell lines.** Expression levels of GLUT1, HKII, LDHA, MCT1, and MCT4 proteins assessed by western blot in the cell pairs A,B) KG-1/KG-1 Ara-R and C,D) MOLM13/MOLM13 Ara-R cells at A,C) 6h and B,D) 24h.  $\alpha$ -Tubulin was used as a loading control. Levels of protein expression were normalized for tubulin. Results were quantified using the ImageJ software and results are presented as mean  $\pm$  SD of at least two independent experiments. Values were expressed as protein levels relative to parental cells normalized for 100%. Statistical significance was estimated by the unpaired two-tailed Student's t-test.

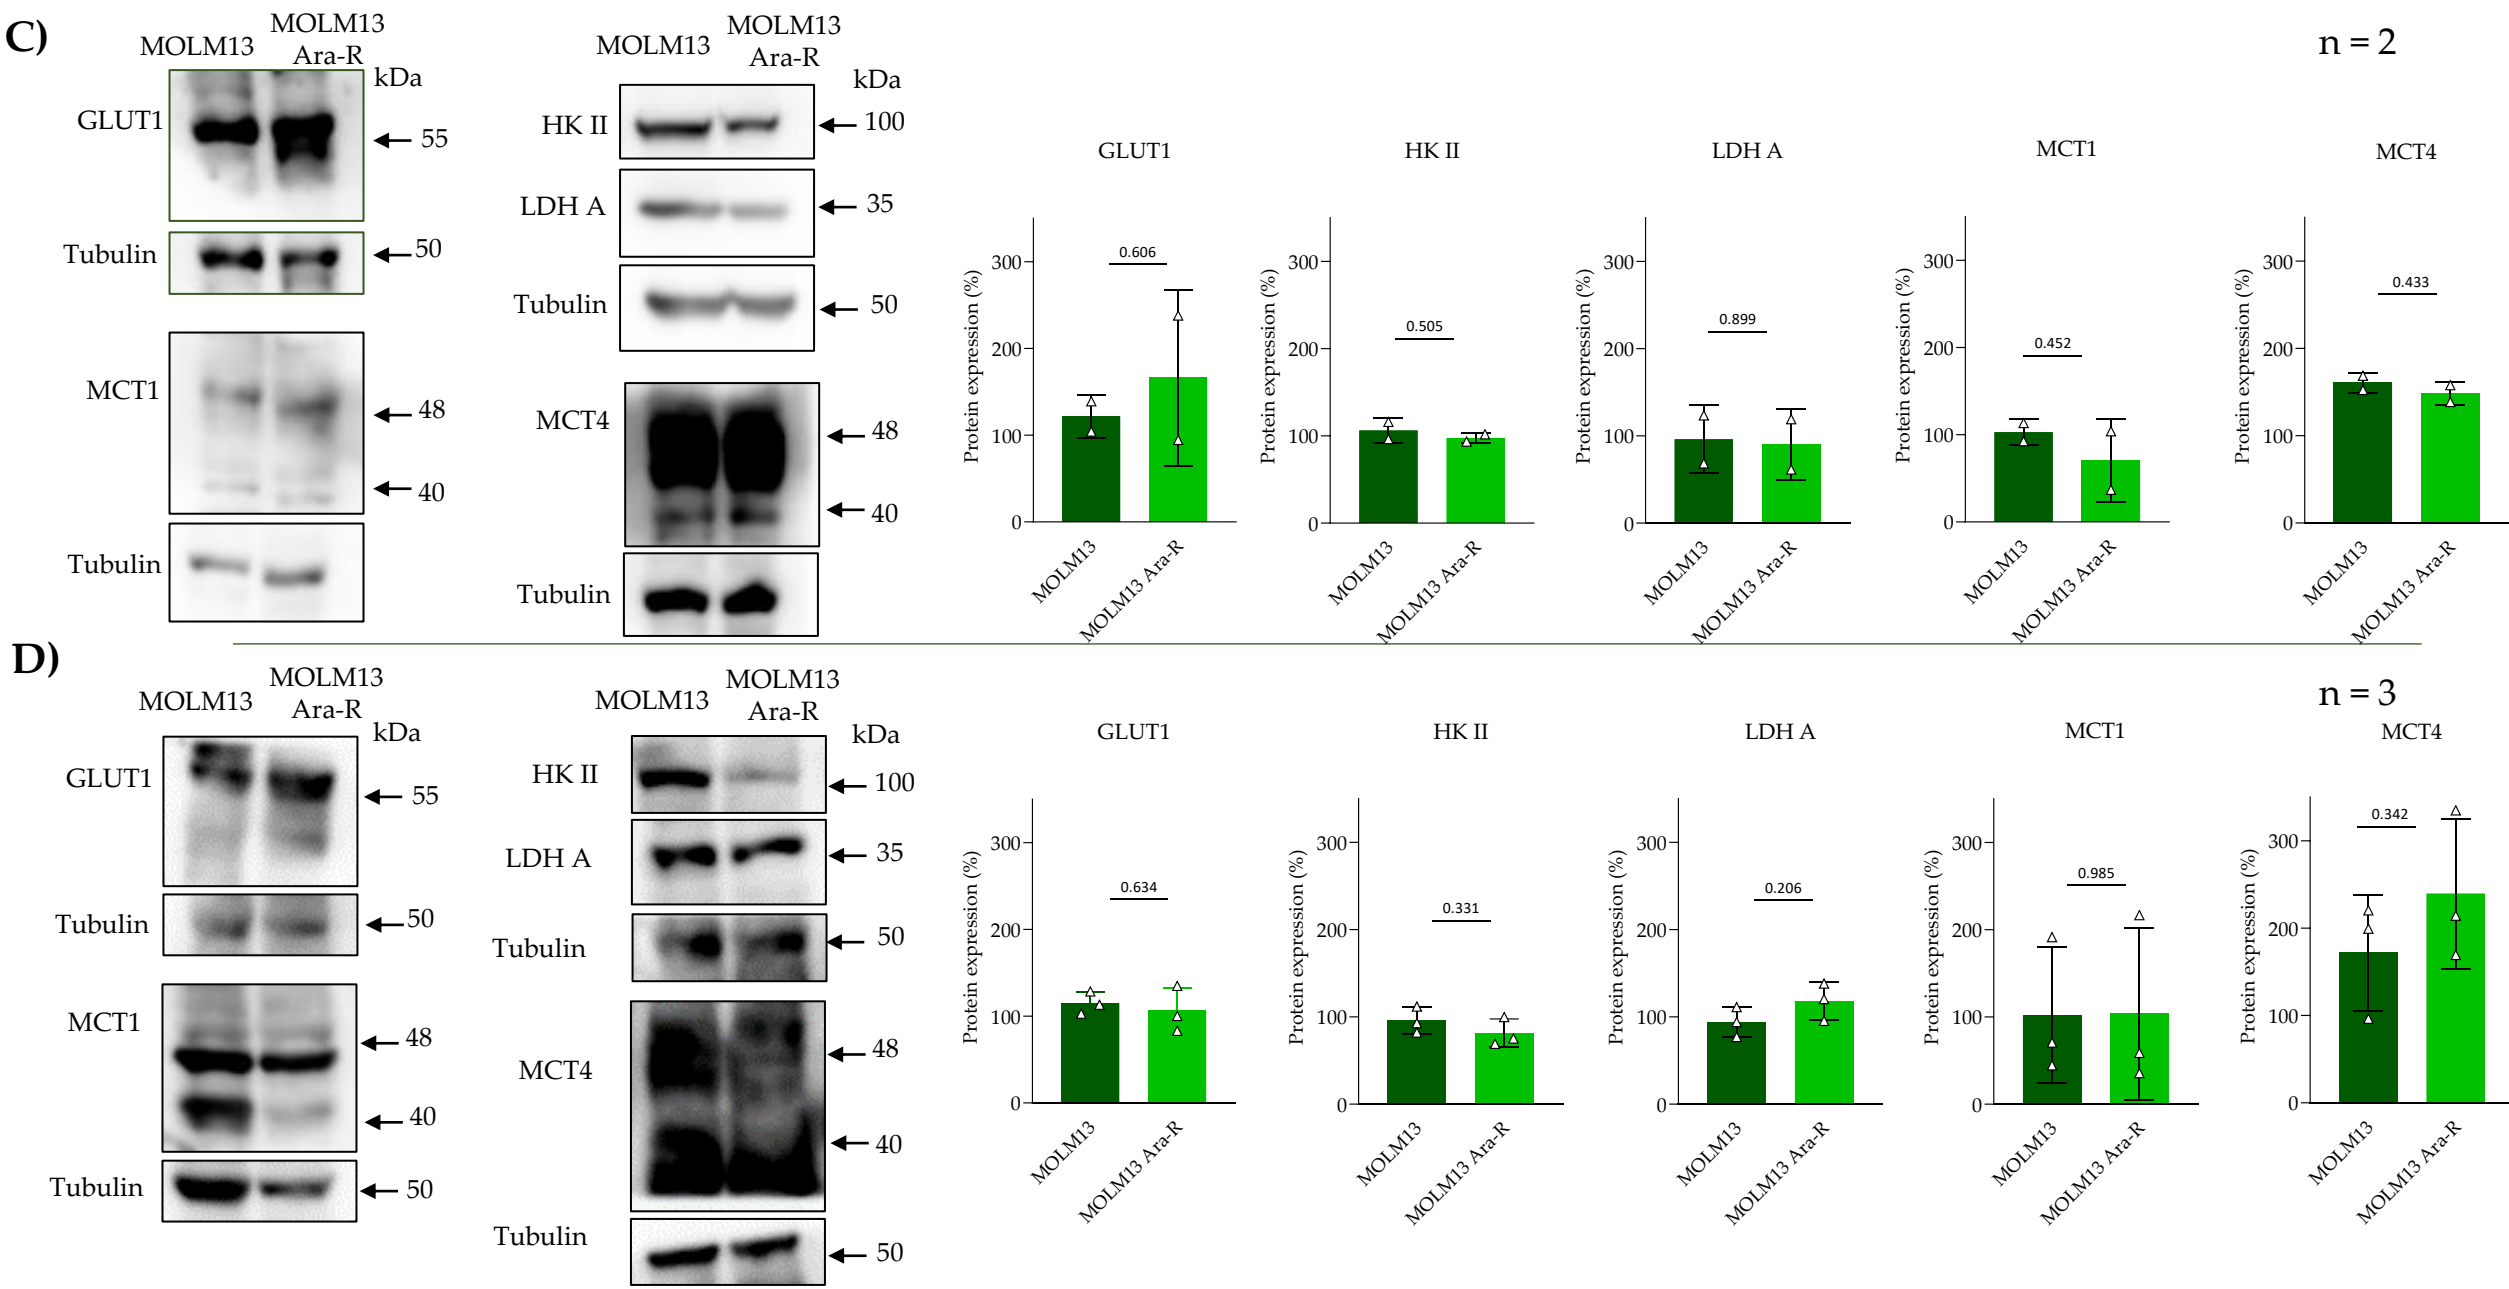

**Figure S7.** (continued).



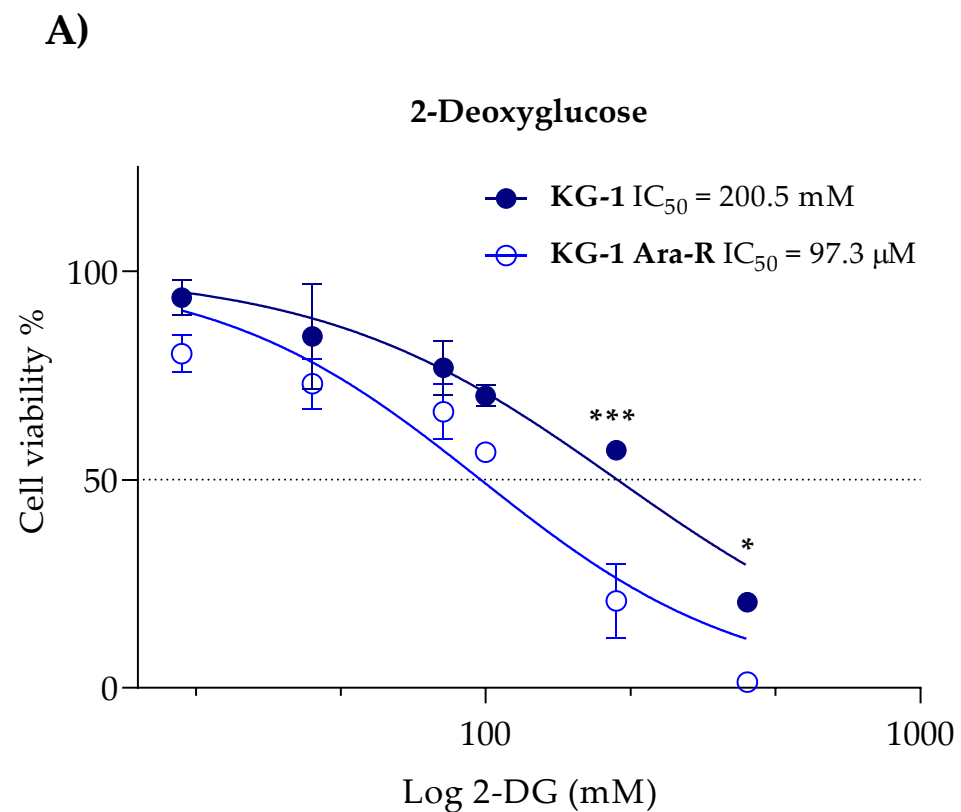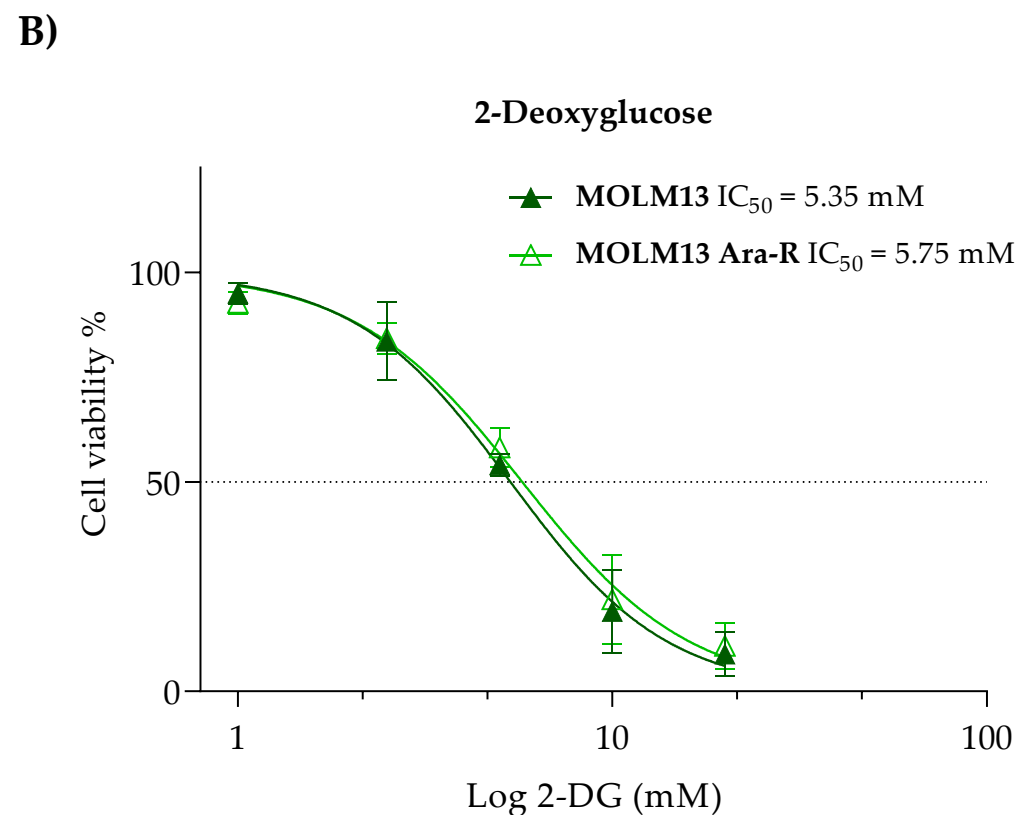

**Figure S8. Effect of 2-deoxy-glucose (2-DG) on Ara-C-resistant and parental AML cell viability.** Dose-response curve to generate  $IC_{50}$  values of (A) KG-1 and KG-1 Ara-R cell lines and (B) MOLM13 and MOLM13 Ara-R cell lines in response to 2-DG. Values are expressed as cell viability relative to vehicle-treated cells normalized to 100%. Values are given as mean  $\pm$  SD. \* $p < 0.05$ ; \*\*\* $p < 0.001$  (Two-way ANOVA followed by Sidak's Multiple Comparison Test). Results are from at least three independent experiments with two replicates.
